# Supplementary material for: Alcohol Contribution to Total Energy Intake and Its Association with Nutritional Status and Diet Quality in Eight Latina American Countries
Source: MDPI journal article supplement (doi:10.3390/ijerph182413130), 2021-12-13
Supplement: s1 [file s1]

**Supplementary Table S1.** Alcohol consumption, energy from alcohol and percentage of total energy intake according to socioeconomic characteristics among non-alcohol consumers.

|                      | N    | Alcohol consumption (g) |      |      |       | Energy from alcohol (Kcal) |      |      |        | Energy from alcohol<br>(percentage of total energy<br>intake) |      |      |      |
|----------------------|------|-------------------------|------|------|-------|----------------------------|------|------|--------|---------------------------------------------------------------|------|------|------|
|                      |      | mean                    | SE   | Min  | Max   | mean                       | SE   | Min  | Max    | mean                                                          | SE   | Min  | Max  |
| Overall sample       | 8145 | 0.29                    | 0.01 | 0.00 | 14.69 | 2.08                       | 0.10 | 0.00 | 103.84 | 0.10                                                          | 0.00 | 0.00 | 8.18 |
| Sex                  |      |                         |      |      |       |                            |      |      |        |                                                               |      |      |      |
| Male                 | 3676 | 0.32                    | 0.02 | 0.00 | 14.44 | 2.24                       | 0.16 | 0.00 | 102.12 | 0.10                                                          | 0.01 | 0.00 | 7.26 |
| Female               | 4469 | 0.27                    | 0.02 | 0.00 | 14.69 | 1.94                       | 0.14 | 0.00 | 103.84 | 7.26                                                          | 0.01 | 0.00 | 8.18 |
| Age group            |      |                         |      |      |       |                            |      |      |        |                                                               |      |      |      |
| 15–19 years          | 1164 | 0.19                    | 0.03 | 0.00 | 14.13 | 1.38                       | 0.22 | 0.00 | 99.89  | 0.06                                                          | 0.01 | 0.00 | 5.76 |
| 20–34 years          | 3024 | 0.29                    | 0.02 | 0.00 | 14.44 | 2.08                       | 0.17 | 0.00 | 102.20 | 0.10                                                          | 0.01 | 0.00 | 6.20 |
| 35–49 years          | 2291 | 0.3                     | 0.03 | 0.00 | 14.69 | 2.13                       | 0.19 | 0.00 | 103.84 | 0.11                                                          | 0.01 | 0.00 | 8.18 |
| 50–65 years          | 1666 | 0.35                    | 0.04 | 0.00 | 14.44 | 2.49                       | 0.26 | 0.00 | 102.20 | 0.12                                                          | 0.01 | 0.00 | 6.42 |
| Countries            |      |                         |      |      |       |                            |      |      |        |                                                               |      |      |      |
| Argentina            | 981  | 0.25                    | 0.03 | 0.00 | 9.93  | 1.77                       | 0.24 | 0.00 | 70.21  | 0.08                                                          | 0.11 | 0.00 | 3.15 |
| Brazil               | 1676 | 0.23                    | 0.03 | 0.00 | 0.12  | 1.64                       | 0.21 | 0.00 | 0.84   | 0.10                                                          | 0.01 | 0.0  | 7.26 |
| Chile                | 764  | 0.41                    | 0.05 | 0.00 | 13.86 | 2.90                       | 0.38 | 0.00 | 98.02  | 0.18                                                          | 0.02 | 0.00 | 5.13 |
| Colombia             | 1149 | 0.25                    | 0.04 | 0.00 | 14.48 | 1.83                       | 0.27 | 0.00 | 102.37 | 0.08                                                          | 0.01 | 0.00 | 4.81 |
| Costa Rica           | 731  | 0.23                    | 0.04 | 0.00 | 13.65 | 1.60                       | 0.30 | 0.00 | 96.51  | 0.08                                                          | 0.02 | 0.00 | 4.68 |
| Ecuador              | 767  | 0.45                    | 0.05 | 0.00 | 14.44 | 3.15                       | 0.37 | 0.00 | 102.12 | 0.13                                                          | 0.02 | 0.00 | 5.76 |
| Peru                 | 1029 | 0.23                    | 0.03 | 0.00 | 12.15 | 1.59                       | 0.24 | 0.00 | 85.89  | 0.08                                                          | 0.01 | 0.00 | 4.74 |
| Venezuela            | 1048 | 0.39                    | 0.06 | 0.00 | 14.69 | 2.76                       | 0.39 | 0.00 | 103.84 | 0.12                                                          | 0.02 | 0.00 | 8.18 |
| Socioeconomic status |      |                         |      |      |       |                            |      |      |        |                                                               |      |      |      |
| Low                  | 5014 | 0.31                    | 0.02 | 0.00 | 14.69 | 2.20                       | 0.14 | 0.00 | 103.84 | 0.11                                                          | 0.01 | 0.00 | 8.18 |
| Middle               | 3131 | 0.27                    | 0.02 | 0.00 | 13.91 | 1.88                       | 0.15 | 0.00 | 98.31  | 0.09                                                          | 0.01 | 0.00 | 5.29 |
| High                 |      |                         |      |      |       |                            |      |      |        |                                                               |      |      |      |
